# Supplementary material for: Integrating scientometric indicators with linguistic data mining to enhance international research collaboration
Source: Research Square preprint supplement (doi:10.21203/rs.3.rs-8428186/v1), 2026-01-14
Supplement: Supplementary file 1 [file fbfdcadc84a8a2a33aa73a41.docx]

Supplementary Material

**Integrating scientometric indicators with linguistic data mining to enhance international research collaboration**

This document contains supplementary tables supporting the network and linguistic analyses presented in the main text. Tables S1–S6 provide detailed metrics for the global and ego-centered co-authorship networks. Tables S7–S13 provide detailed data from the linguistic data mining of article titles.

## Section A: Network Analysis Tables

### **Table S1.** Summary of selected case-study researchers according to four comparative dimensions.

| **Researcher** | **Volume of output** | **Dispersion of collaborations** | **Bridge across communities** | **Stability of ties** |
| --- | --- | --- | --- | --- |
| Ana M. Geer | Medium | Low | Not clear | High |
| Charlotte Madore | High | Medium | Yes (with Oleg) | High |
| François Alla | High | High | Yes | High |
| Karim Kelfoun | Medium | High | Partial | Low |

*Note:* Volume of output refers to the overall publication productivity weighted by JCR impact. Dispersion of collaborations captures the extent to which co-authorships span multiple communities. Bridge across communities indicates whether the researcher plays a structural role in connecting separated groups. Stability of ties reflects the persistence/consistency of collaborative links.

### **Table S2**. Top 10 researchers in the Global Network ranked by total production and centrality metrics.

| **Rank** | **Name** | **Weighted degree** | **Betweenness Centrality** | **PageRank** | **Contributors** |
| --- | --- | --- | --- | --- | --- |
| 1 | François Alla | 633.93 | 1.00000 | 1.00000 | 506 |
| 2 | Charlotte Madore | 264.83 | 0.04472 | 0.24169 | 176 |
| 3 | Oleg Butovsky | 224.46 | 0.02339 | 0.19115 | 150 |
| 4 | Ana M. Geer | 196.66 | 0.00912 | 0.13548 | 71 |
| 5 | Bruno Hoen | 154.61 | 0.00118 | 0.13954 | 66 |
| 6 | Karim Kelfoun | 143.51 | 0.08959 | 0.44543 | 175 |
| 7 | Xavier Duval | 143.40 | 0.00090 | 0.12844 | 62 |
| 8 | Ilaria Montagni | 110.28 | 0.34236 | 0.33603 | 164 |
| 9 | Bernard Iung | 110.19 | 0.00045 | 0.09866 | 53 |
| 10 | Alain Weill | 107.38 | 0.01130 | 0.11329 | 45 |

*Note:* Weighted Degree reflects JCR-weighted production; Betweenness Centrality indicates brokerage roles; PageRank indicates structural influence.

### **Table S3**. Top 10 researchers in Ana M. Geer’s collaboration network.

| **Rank** | **Name** | **Total Prod.** | **Centrality** | **Relevance** | **Contributors** |
| --- | --- | --- | --- | --- | --- |
| 1 | Ana M. Geer | 196.66 | 1.00000 | 1.00000 | 71 |
| 2 | Cristina Tejel | 98.55 | 0.01664 | 0.40674 | 17 |
| 3 | Miguel A. Ciriano | 83.37 | 0.00636 | 0.34624 | 14 |
| 4 | Deborah L. Kays | 81.95 | 0.05949 | 0.49010 | 35 |
| 5 | Jose A. Lopez | 71.66 | 0.00264 | 0.30182 | 13 |
| 6 | William Lewis | 69.60 | 0.04584 | 0.43769 | 31 |
| 7 | Alexander J. Blake | 57.45 | 0.00920 | 0.34938 | 23 |
| 8 | Helen R. Sharpe | 40.58 | 0.00395 | 0.25913 | 20 |
| 9 | Laurence J. Taylor | 39.32 | 0.01553 | 0.29260 | 27 |
| 10 | T. Brent Gunnoe | 28.50 | 0.00932 | 0.24862 | 24 |

### **Table S4**. Top 10 researchers in Charlotte Madore’s collaboration network.

| **Rank** | **Name** | **Total Prod.** | **Centrality** | **Relevance** | **Contributors** |
| --- | --- | --- | --- | --- | --- |
| 1 | Charlotte Madore | 264.83 | 1.00000 | 1.00000 | 176 |
| 2 | Oleg Butovsky | 224.46 | 0.54618 | 0.79087 | 150 |
| 3 | Zhuoran Yin | 86.22 | 0.02924 | 0.27738 | 57 |
| 4 | Jean-Christophe Delpech | 68.91 | 0.03736 | 0.27231 | 61 |
| 5 | Christian Gauthier | 60.86 | 0.01471 | 0.20679 | 50 |
| 6 | Caroline Baufeld | 44.34 | 0.00000 | 0.13529 | 4 |
| 7 | Susanne Krasemann | 43.76 | 0.00844 | 0.17199 | 39 |
| 8 | Kristen M. Pitts | 42.62 | 0.00156 | 0.13380 | 32 |
| 9 | Milica A. Margeta | 42.62 | 0.00156 | 0.13380 | 32 |
| 10 | Sebastian Silveira | 42.62 | 0.00156 | 0.13380 | 32 |

### **Table S5**. Top 10 researchers in François Alla’s collaboration network.

| **Rank** | **Name** | **Total Prod.** | **Centrality** | **Relevance** | **Contributors** |
| --- | --- | --- | --- | --- | --- |
| 1 | François Alla | 633.93 | 1.00000 | 1.00000 | 506 |
| 2 | Bruno Hoen | 154.61 | 0.00165 | 0.13968 | 66 |
| 3 | Xavier Duval | 143.40 | 0.00154 | 0.12856 | 62 |
| 4 | Bernard Iung | 110.19 | 0.00074 | 0.09877 | 53 |
| 5 | Alain Weill | 107.38 | 0.00186 | 0.11211 | 45 |
| 6 | Catherine Chirouze | 85.94 | 0.00052 | 0.08138 | 51 |
| 7 | Christine Selton-Suty | 85.18 | 0.00431 | 0.10276 | 91 |
| 8 | Philippe Ricordeau | 84.11 | 0.00006 | 0.08120 | 22 |
| 9 | Pierre Tattevin | 82.68 | 0.00009 | 0.07053 | 38 |
| 10 | Vincent Le Moing | 76.90 | 0.00016 | 0.06763 | 39 |

### **Table S6**. Top 10 researchers in Karim Kelfoun’s collaboration network.

| **Rank** | **Name** | **Total Prod.** | **Centrality** | **Relevance** | **Contributors** |
| --- | --- | --- | --- | --- | --- |
| 1 | Karim Kelfoun | 143.51 | 1.00000 | 1.00000 | 175 |
| 2 | R. Paris | 22.11 | 0.01182 | 0.15184 | 36 |
| 3 | Valentin Gueugneau | 19.19 | 0.00693 | 0.15107 | 28 |
| 4 | T. H. Druitt | 17.68 | 0.00079 | 0.08400 | 17 |
| 5 | P. Nomikou | 17.13 | 0.00539 | 0.09631 | 29 |
| 6 | Antonio Proano | 13.57 | 0.00000 | 0.07471 | 1 |
| 7 | Philippe Labazuy | 13.26 | 0.00093 | 0.10173 | 17 |
| 8 | Steven Carey | 12.90 | 0.00185 | 0.06840 | 23 |
| 9 | Maria E. Martin Gonzalez | 12.35 | 0.00000 | 0.06705 | 4 |
| 10 | Juan J. Coello Bravo | 12.35 | 0.00000 | 0.06705 | 4 |

#

# Section B: Linguistic Analysis Tables

**Table S7**. Measures of lexical diversity in article titles.

|  | Geer’s network titles | Madore’s network titles | Alla’s network titles | Kelfoun’s network titles |
| --- | --- | --- | --- | --- |
| Nº of titles | 27 | 31 | 164 | 51 |
| Running words | 270 | 428 | 2,543 | 775 |
| Tokens used for word list | 266 | 392 | 2536 | 775 |
| Types (distinct words) | 138 | 227 | 877 | 347 |
| Moving Average Type/Token Ratio (MATTR) | 0.77 | 0.82 | 0.82 | 0.84 |
| Measure of Textual Lexical Diversity (MTLD) | 65.70 | 96.09 | 108.79 | 121.38 |
| Sentences | 27 | 31 | 164 | 51 |
| Mean (in words) per title | 9.56 | 13.45 | 15.30 | 14.63 |
| Std.dev. | 3.20 | 5.30 | 5.60 | 4.88 |

**Table S8**. Measures of lexical sophistication (Top 10 frequency list items).

| Geer’s network titles | | Madore’s network titles | | Alla’s network titles | | Kelfoun’s network titles | |
| --- | --- | --- | --- | --- | --- | --- | --- |
| Type | Absolute frequency (Relative frequency) | Type | Absolute frequency (Relative frequency) | Type | Absolute frequency (Relative frequency) | Type | Absolute frequency (Relative frequency) |
| complexes | 19 (769,231) | of | 22 (582,011) | of | 122 (497,350) | of | 47 (630,027) |
| of | 16 (647,773) | in | 20 (529,101) | in | 117 (476,967) | the | 35 (469,169) |
| and | 11 (445,344) | and | 15 (396,825) | and | 92 (375,051) | and | 29 (388,740) |
| rhodium | 8 (323,887) | the | 13 (343,915) | a | 91 (370,974) | a | 23 (308,311) |
| a | 6 (242,915) | microglia | 10 (264,550) | the | 79 (322,055) | volcano | 15 (201,072) |
| by | 6 (242,915) | a | 7 (185,185) | health | 51 (207,909) | numerical | 14 (187,668) |
| in | 5 (202,429) | microglial | 7 (185,185) | study | 42 (171,219) | for | 13 (174,263) |
| bond | 3 (121,457) | to | 6 (158,730) | with | 30 (122,299) | pyroclastic | 13 (174,263) |
| carbon | 3 (121,457) | brain | 4 (105,820) | to | 29 (118,223) | at | 11 (147,453) |
| electrocatalytic | 3 (121,457) | n-3 | 4 (105,820) | cohort | 27 (110,069) | volcanic | 9 (120,643) |

**Table S9**. Measures of lexical density (content vs. function words).

|  | Geer’s network titles | Madore’s network titles | Alla’s network titles | Kelfoun’s network titles |
| --- | --- | --- | --- | --- |
| Content words (total)  Comparative % | 217  80% | 271  71.31% | 1,073  70.14% | 547  71,78% |
| Function words (total)  Comparative % | 54  20% | 109  28.6% | 725  29.86% | 215  28.22% |

**Table S10**. Collocational diversity (Top 10 collocations).

| Geer’s network titles  (search term: *complexes*) | | Madore’s network titles  (search term: *microglía*) | | Alla’s network titles  (search term: *health*) | | Kelfoun’ network  (search term: *volcano*) | |
| --- | --- | --- | --- | --- | --- | --- | --- |
| R | of | R | in | L | of | L | of |
| L | rhodium | L | of | L | in | R | a |
| R | and | L | the | R | the | L | at |
| R | by | R | and | L | and | L | eruption |
| M | **complexes** | M | to | R | research | M | the |
| L | terminal | L | neurodegenerative | L | public | L | merapi |
| L | iridium | - | - | R | intervention | L | kolumbo |
| R | in | - | - | R | a | R | and |
| R | p-c | - | - | R | interventions | R | monitoring |
| R | for | - | - | M | health | R | ecuador |

**Table S11**. Measures of syntactic complexity according to linguistic properties.

| Linguistic properties | Geer’s network titles | Madore’s network titles | Alla’s network titles | Kelfoun’s network titles |
| --- | --- | --- | --- | --- |
| Punctuation (% of titles with subtitles) | 3.7% (1 title) | 22.58% (7 titles) | 65.24% (107 titles) | 25.49% (13 titles) |
| Grammatical structure (% of titles with phrasal (P) structure) | 100% | 58% | 92.07% | 100% |
| Grammatical structure (% of titles with clausal structure (C)) | 0% | 42% | 7.92% | 0% |

**Table S12**. Measures of syntactic complexity (Top 10 bigrams).

| Geer’s network titles | | Madore’s network titles | | Alla’s network titles | | Kelfoun’s network titles | |
| --- | --- | --- | --- | --- | --- | --- | --- |
| Bigram | Absolute frequency (Relative frequency) | Bigram | Absolute frequency (Relative frequency) | Bigram | Absolute frequency (Relative frequency) | Bigram | Absolute frequency (Relative frequency) |
| rhodium complexes | 6 (243,902) | in the | 4 (106,101) | cohort study | 23 (93,801) | of the | 13 (174,497) |
| electrocatalytic water | 3 (121,951) | microglia in | 4 (106,101) | infective endocarditis | 22 (89,723) | avalanche chile | 5 (67,114) |
| water oxidation | 3 (121,951) | model of | 3 (79,576) | in france | 19 (77,488) | debris avalanche | 5 (67,114) |
| access to | 2 (81,301) | of microglia | 3 (79,576) | of the | 17 (69,331) | pyroclastic flow | 5 (67,114) |
| and electronic | 2 (81,301) | the brain | 3 (79,576) | heart failure | 15 (61,175) | eruption of | 4 (53,691) |
| bond formation | 2 (81,301) | dietary n-3 | 2 (53,050) | in the | 12 (48,940) | merapi volcano | 4 (53,691) |
| by a | 2 (81,301) | fatty acid | 2 (53,050) | of a | 12 (48,940) | numerical simulation | 4 (53,691) |
| carbon for | 2 (81,301) | in a | 2 (53,050) | public health | 11 (44,861) | numerical simulations | 4 (53,691) |
| complexes in | 2 (81,301) | loss of | 2 (53,050) | smoking cessation | 10 (40,783) | the socompa | 4 (53,691) |
| complexes on | 2 (81,301) | microglia and | 2 (53,050) | associated with | 8 (32,626) | by the | 3 (40,268) |

**Table S13**. Measures of syntactic complexity (Top 10 trigram structures).

| Geer’s network titles | | Madore’s network titles | | Alla’s network titles | | Kelfoun’s network titles | |
| --- | --- | --- | --- | --- | --- | --- | --- |
| Trigram | Absolute frequency (Relative frequency) | Trigram | Absolute frequency (Relative frequency) | Trigram | Absolute frequency (Relative frequency) | Trigram | Absolute frequency (Relative frequency) |
| electrocatalytic water oxidation | 3 (122,449) | in the brain | 2 (53,191) | of infective endocarditis | 7 (28,560) | debris avalanche chile | 3 (40,323) |
| and electronic studies | 2 (81,633) | mouse model of | 2 (53,191) | factors associated with | 6 (24,480) | of merapi volcano | 3 (40,323) |
| carbon for electrocatalytic | 2 (81,633) | n-3 polyunsaturated fatty | 2 (53,191) | health intervention research | 6 (24,480) | of the socompa | 3 (40,323) |
| complexes on ordered | 2 (81,633) | of microglia in | 2 (53,191) | in patients with | 6 (24,480) | aegean sea greece | 2 (26,882) |
| easy access to | 2 (81,633) | a model of | 1 (26,596) | a french nationwide | 5 (20,400) | and implications for | 2 (26,882) |
| electronic studies of | 2 (81,633) | a mouse model | 1 (26,596) | in france a | 5 (20,400) | at tungurahua volcano | 2 (26,882) |
| for electrocatalytic water | 2 (81,633) | a pro-resolving oxylipin | 1 (26,596) | in france in | 5 (20,400) | avalanche chile numerical | 2 (26,882) |
| mesoporous carbon for | 2 (81,633) | a protective microglial | 1 (26,596) | population health intervention | 5 (20,400) | eruption of kolumbo | 2 (26,882) |
| of substituted terphenyl | 2 (81,633) | a record of | 1 (26,596) | prospective cohort study | 5 (20,400) | eruption of merapi | 2 (26,882) |
| on ordered mesoporous | 2 (81,633) | a regulator of | 1 (26,596) | study based on | 5 (20,400) | insights into the | 2 (26,882) |
